# Supplementary material
Source: PubMed Central journal article supplement (PMC6307965)
Supplement: jci-129-98098-s212.pdf [file jci-129-98098-s212.pdf]

## Supplemental Figure 1

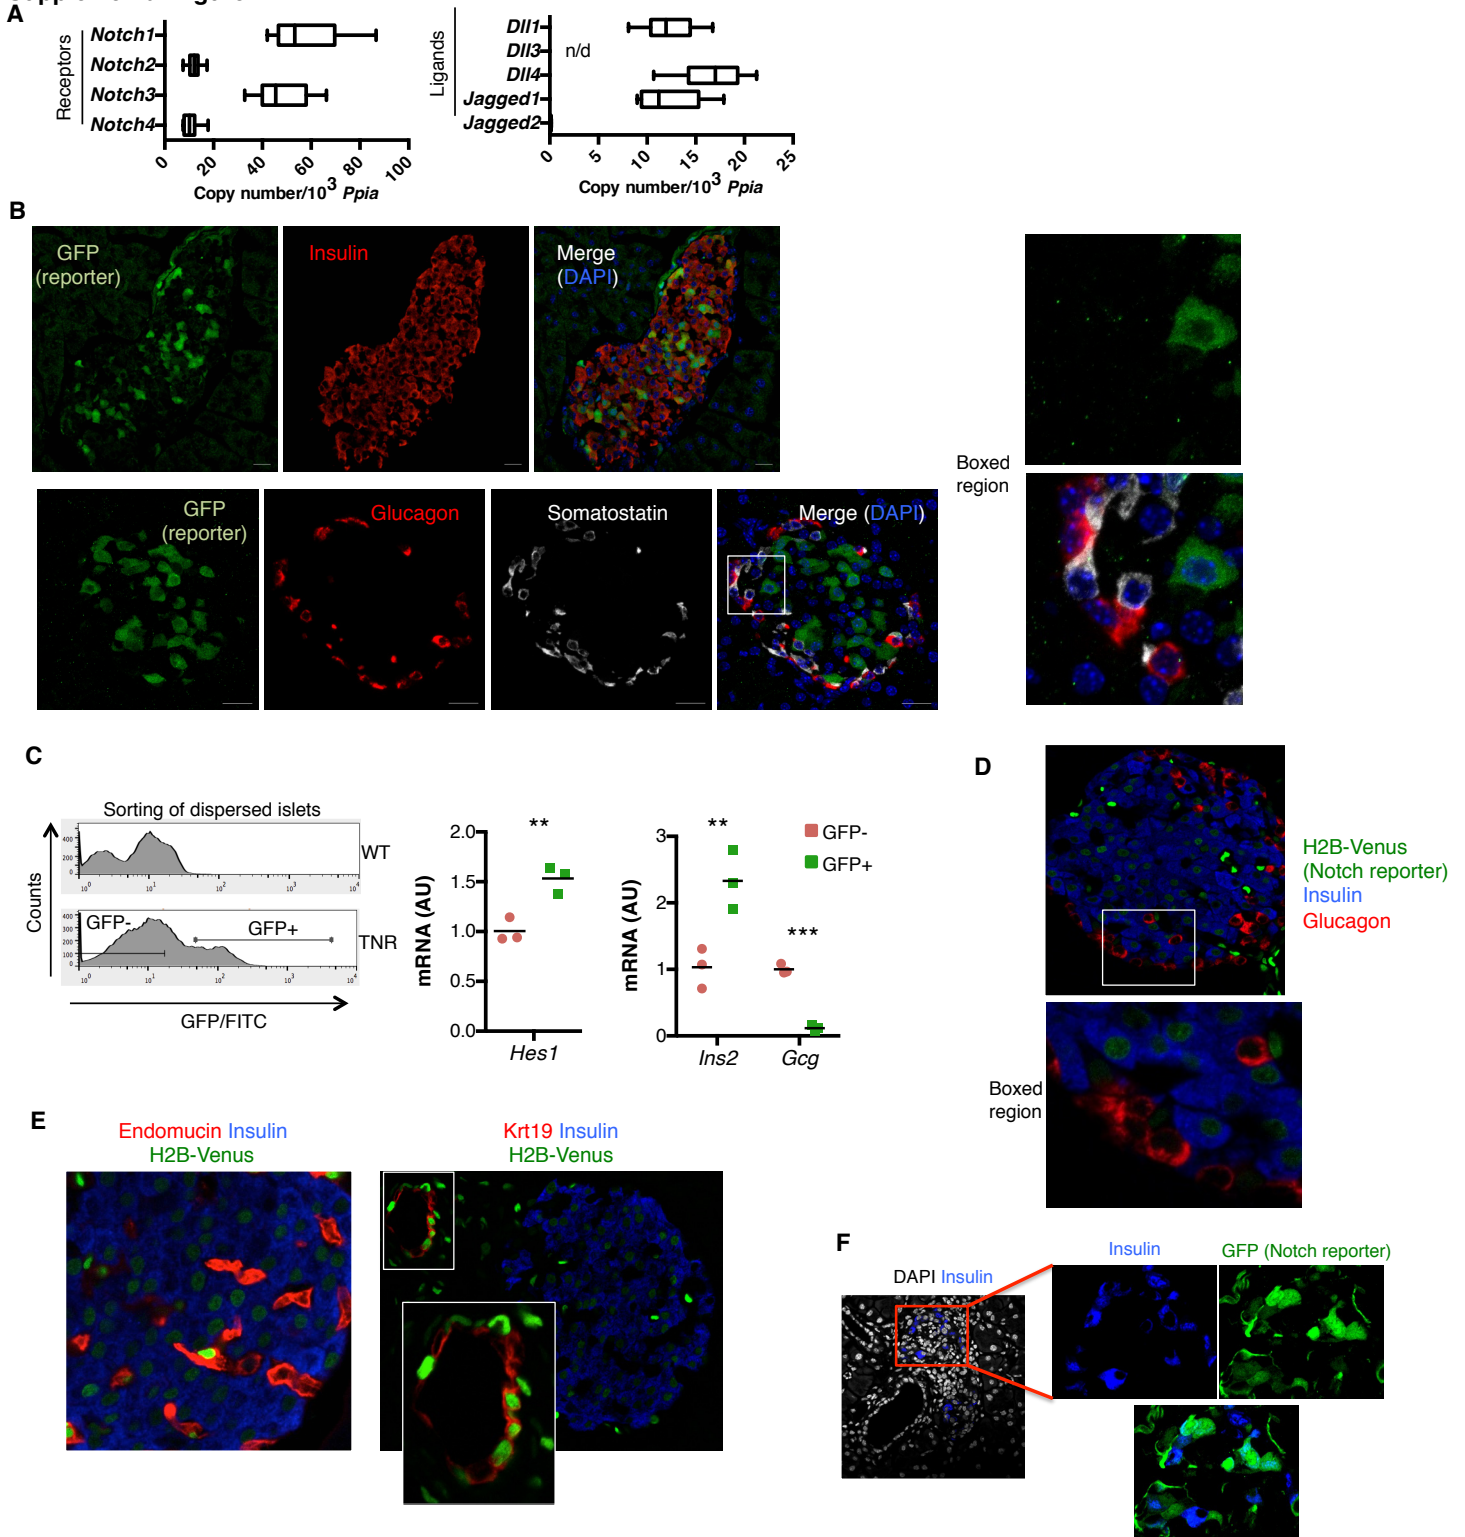

### Supplemental Figure 1. Islet Notch activity is mostly restricted to $\beta$ cells.

(A) Notch receptor and ligand expression in islets isolated from adult WT mice. Results show absolute quantitation of gene copies relative to *Ppia* (N=10 mice/group).

(B) Representative images of pancreatic sections from adult TNR mice (N=9 mice).

(C) FACS histogram from dispersed islet cells from WT and TNR mice, and gene expression from GFP- and GFP+ cells sorted from TNR mice (N=3 mice/group).

(D) Representative image of pancreas sections from H2B-Venus Notch reporter mice showing Venus fluorescence and insulin/glucagon staining (N=5 mice).

(E) Representative images of pancreatic sections from H2B-Venus Notch reporter mice showing Venus fluorescence and insulin co-staining with endomucin (left) or Krt19 (right), (N=5 mice).

(F) Representative images of pancreatic sections from TNR mice treated with low-dose STZ (N=5 mice).

Scale bars: 20  $\mu$ m. All data are shown with group means; \*\*,  $P < 0.01$ , \*\*\*,  $P < 0.001$  by two-tailed  $t$  test.

**Supplemental Figure 2**

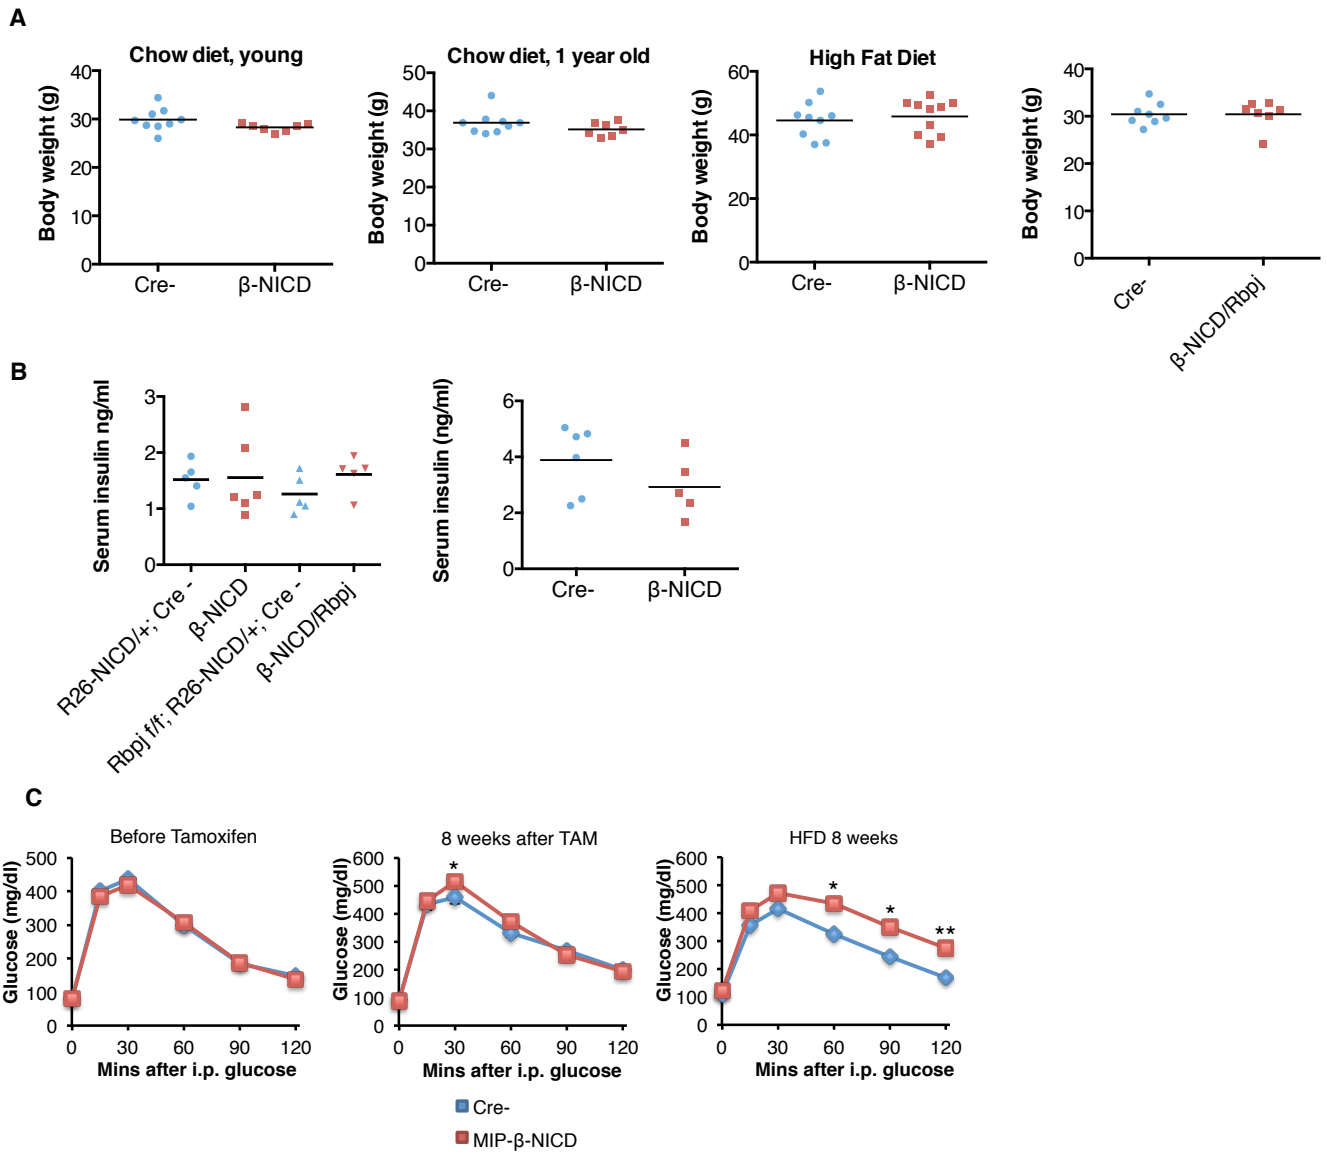

**Supplemental Figure 2.  $\beta$ -NICD and MIP- $\beta$ -NICD mice show normal body weight and fasting insulin, but glucose intolerance.**

(A) Body weight of Cre-,  $\beta$ -NICD and  $\beta$ -NICD/Rbpj mouse cohorts from Figure 2.

(B) Plasma insulin in adult Cre-,  $\beta$ -NICD and  $\beta$ -NICD/Rbpj mice (N=5-7 mice/group), or in 1-year-old Cre- and  $\beta$ -NICD mice (N=5-6 mice/group), all taken after 5h fasting.

(C) GTT in MIP- $\beta$ -NICD and Cre- control mice before and 8 weeks after tamoxifen-induced recombination (same cohort), or in an independent cohort of HFD-fed mice 8 weeks after tamoxifen treatment (N=5-10 mice/group).

All data are shown with group means  $\pm$  s.e.m; \*,  $P < 0.05$ , \*\*,  $P < 0.01$  by two-tailed  $t$  test.

### Supplemental Figure 3

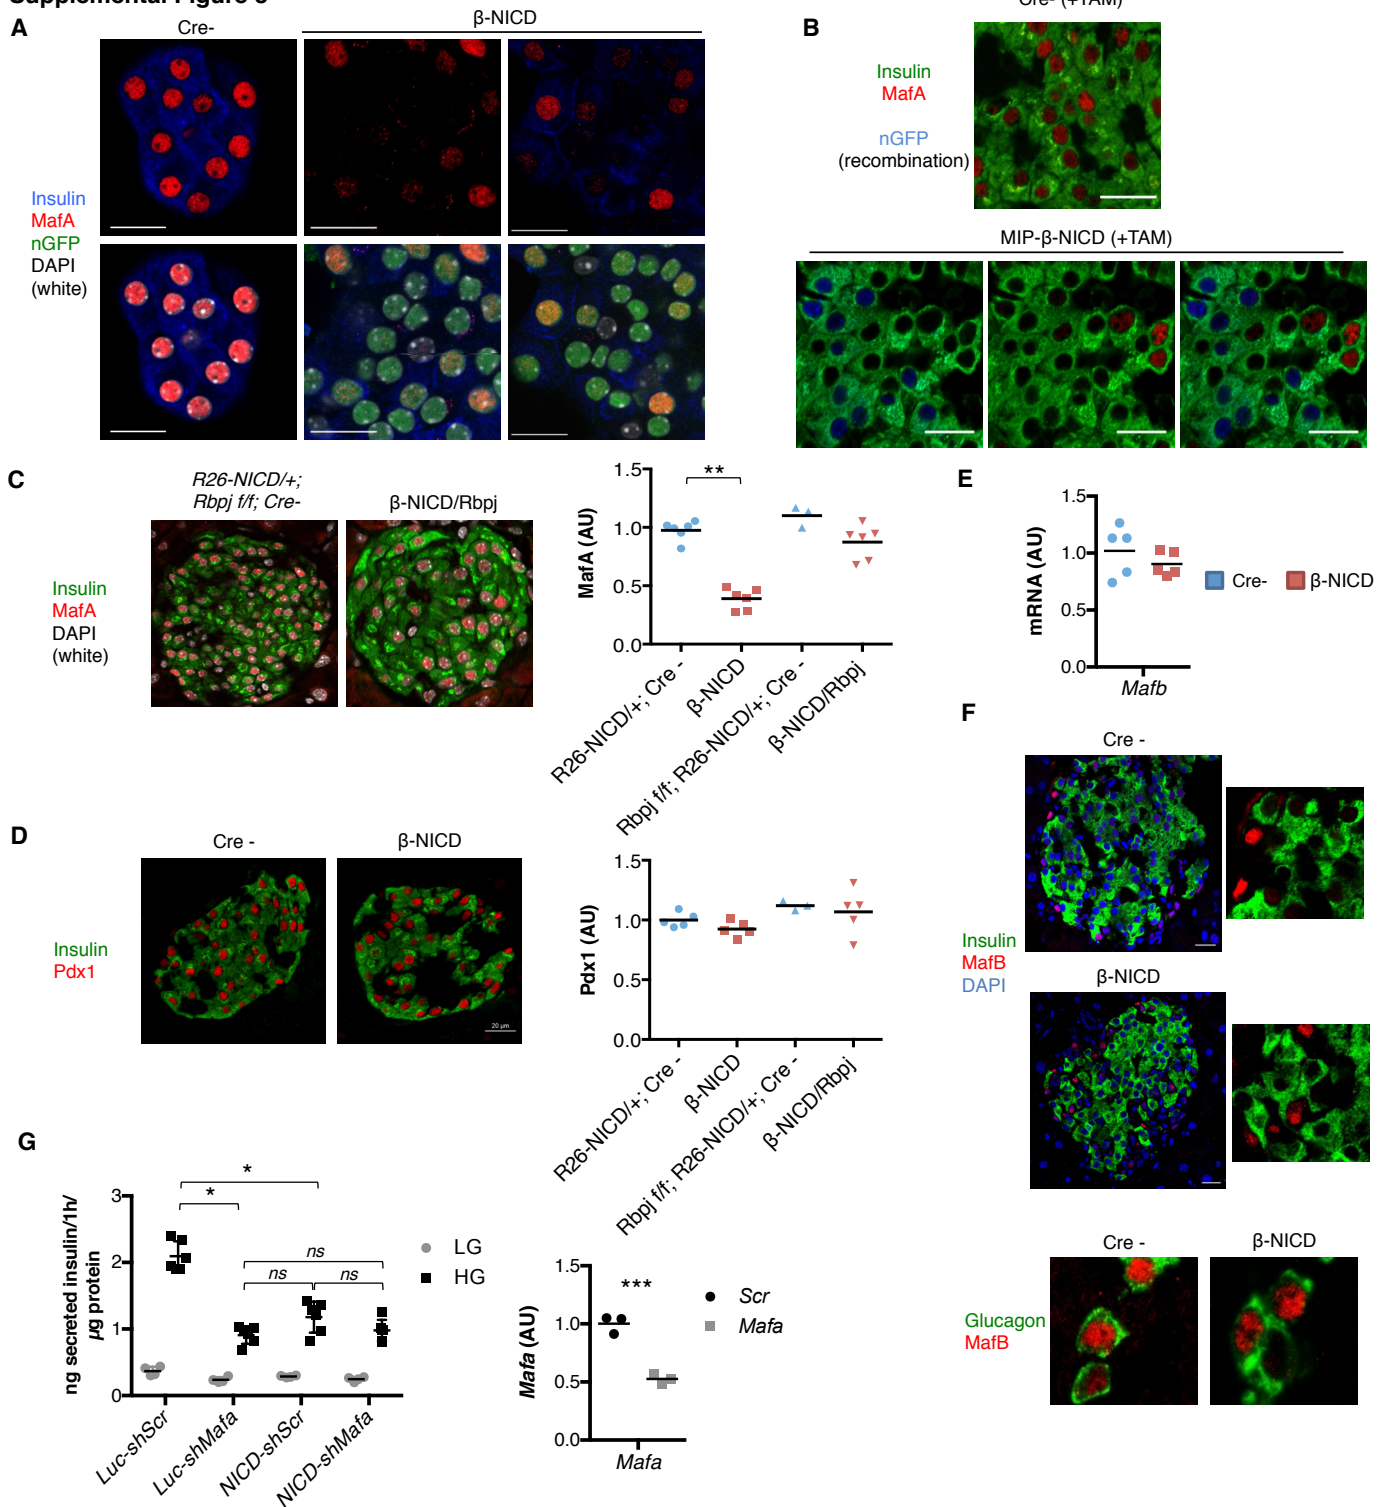

### Supplemental Figure 3. Canonical Notch signaling induces a selective loss of MafA in $\beta$ cells.

(A) Representative images of MafA staining in dispersed islet cells from  $\beta$ -NICD and Cre- control mice, cultured in vitro for 96h. Nuclear GFP (nGFP, co-expressed with NICD) is indicative of recombination in the Rosa26 locus.

(B) Representative images of MafA staining in pancreatic sections from Cre- and MIP- $\beta$ -NICD mice, 8 weeks after tamoxifen treatment (N=5 mice/group).

(C) Representative images of MafA staining in pancreatic sections from  $\beta$ -NICD/Rbpj and Cre- control mice, with quantitation of MafA fluorescence intensity, including sections from Figure 3A (N=3-6 mice/group).

(D) Representative images of Pdx1 staining in pancreatic sections from  $\beta$ -NICD and Cre- control mice, with quantitation of Pdx1 fluorescence intensity (N=3-5 mice/group).

(E) *Mafb* gene expression in islets isolated from  $\beta$ -NICD and Cre- control mice (N=5 mice/group).

(F) MafB staining in pancreatic sections from  $\beta$ -NICD and Cre- control mice, co-stained with insulin (top), and glucagon (bottom), (N= 3 mice/group).

(G) GSIS from MIN6 cells transduced with lentivirus encoding NICD or Luciferase (Luc), with shRNA against MafA (shMafa) or scrambled control (shScr), in medium containing low (1 mM, LG) or high glucose (25 mM, HG), and *Mafa* gene expression (N=3 independent experiments).

Scale bars: 20  $\mu$ m. All data are shown with group means  $\pm$  s.e.m.; \*,  $P < 0.05$ , \*\*,  $P < 0.01$  by two-tailed *t* test.

## Supplemental Figure 4

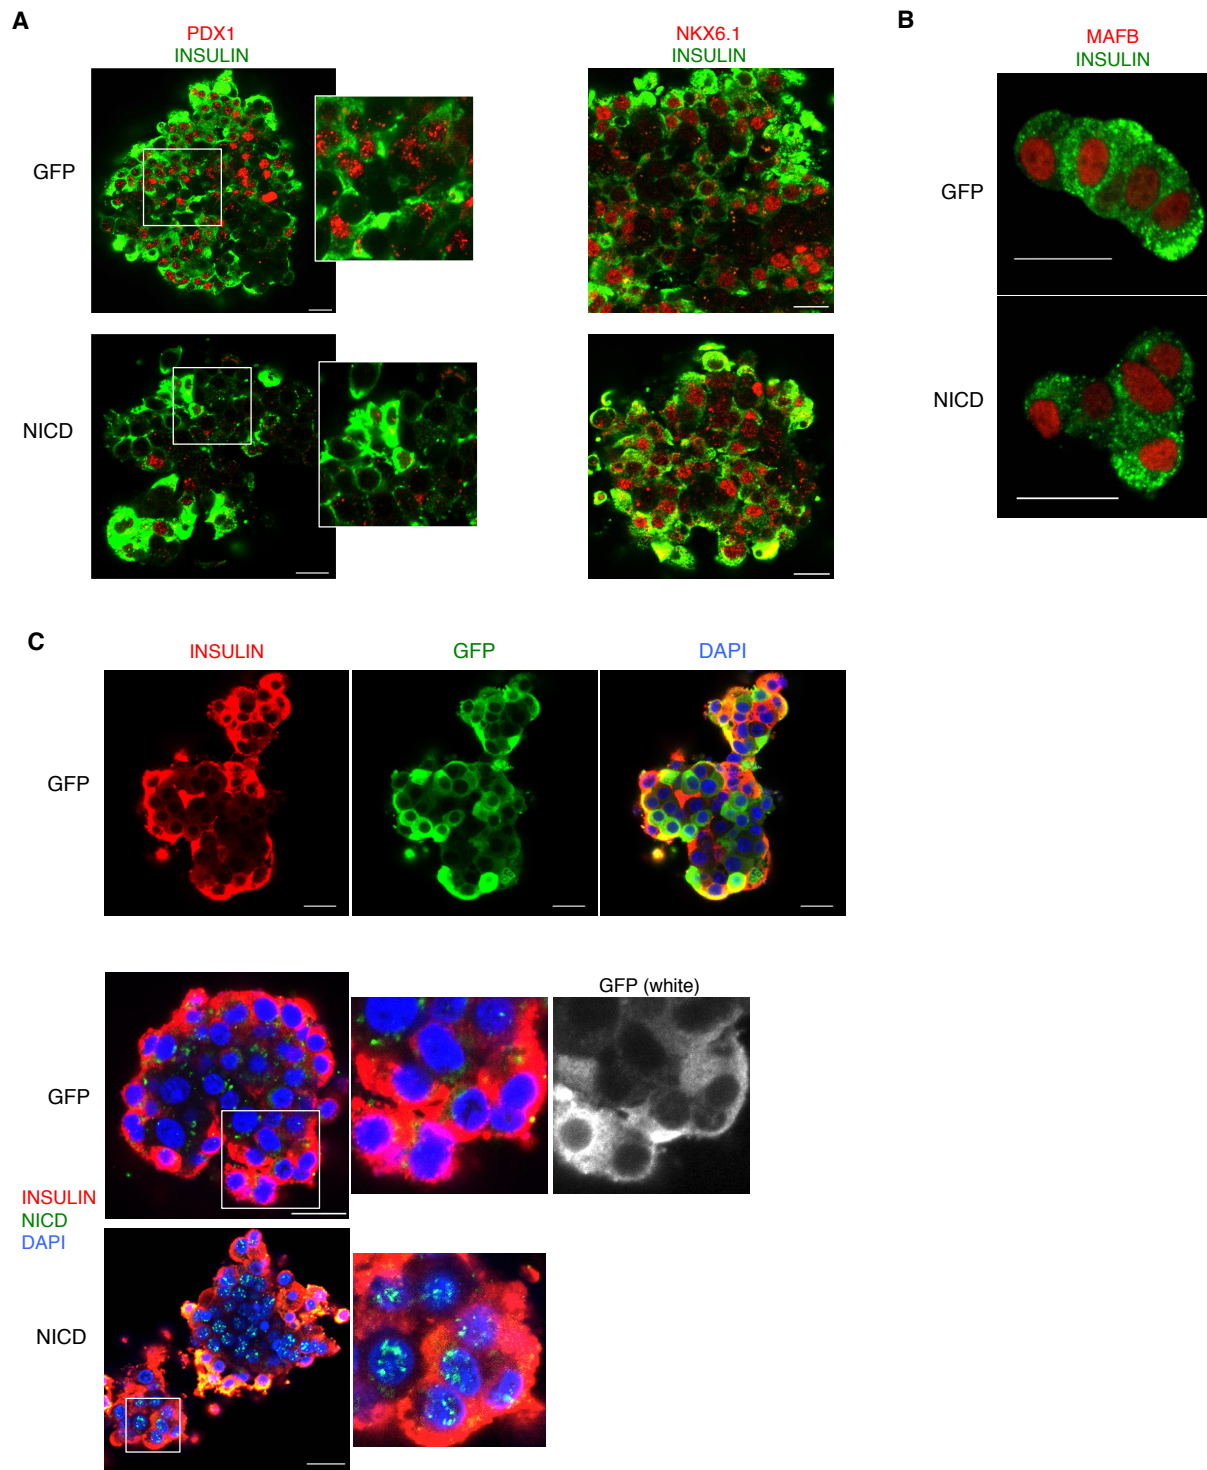

### Supplemental Figure 4. NICD expression in human islets

(A) Confocal images of whole islets transduced with lentivirus expressing GFP or NICD, stained with antibodies against insulin and PDX1 (left) and NKX6.1 (right).

(B) MAFB levels in dispersed human  $\beta$  cells transduced with lentivirus expressing GFP or NICD.

(C) Confocal images of whole islets transduced with lentivirus expressing GFP (top) or NICD (bottom).

Representative images from a total of 6 donors. Scale bars: 20  $\mu$ m.

## Supplemental Figure 5

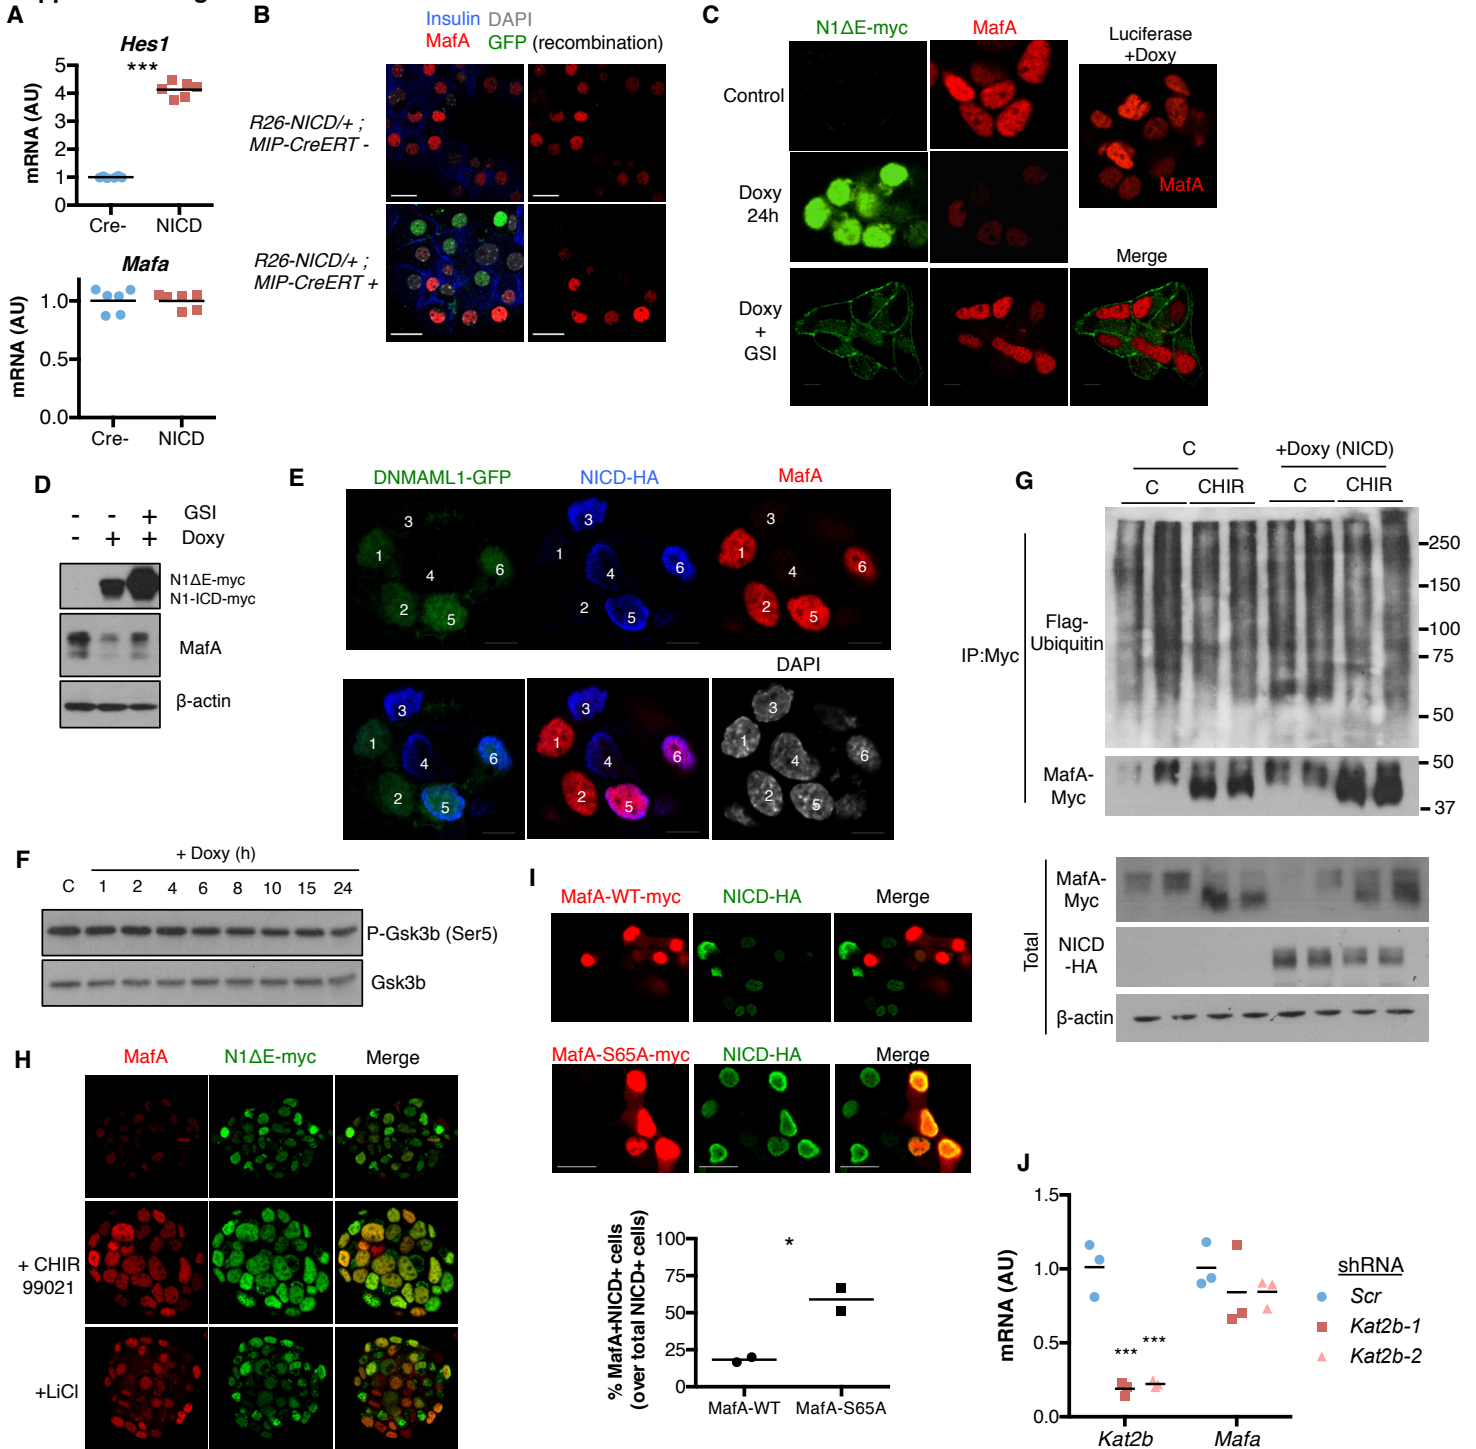

### Supplemental Figure 5. NICD-mediated loss of MafA

(A) Gene expression in islets isolated from tamoxifen-naïve Cre- or MIP-β-NICD mice, cultured with 1 μM 4-OHT for 4 days (N=6 mice/group).

(B) Representative immunofluorescence images from dispersed islet cells isolated from tamoxifen-naïve Cre- or MIP-β-NICD mice, cultured with 1 μM 4-OHT for 4 days (N=6 mice/group).

(C) Representative immunofluorescence images of MIN6-rTTA3 N1ΔE-myc Tet-On cells, stimulated with doxycycline (Doxy) with or without a γ-secretase inhibitor (GSI: dibenzazepine 100 nM). (N=4 independent experiments).

(D) Western blots of MIN6-rTTA3 N1ΔE-myc Tet-On cells stimulated with Doxy and/or GSI.

(E) Representative immunofluorescence images of MIN6-rTTA3 cells transduced with DNAMAML1-GFP, then transfected with NICD-HA. Cells labeled #1 and 2 are DNAMAML1+, #3 and 4 are NICD+ (and MafA-) while #5 and 6 are DNAMAML1+ NICD+ and show preserved MafA levels.

(F) Western blots of MIN6-rTTA3 N1ΔE-myc Tet-On cells stimulated with Doxy for the indicated times.

(G) Western blots of MafA-Myc immunoprecipitate (top) and total lysate (bottom) in 293T cells with stable integration of the rTTA3 transcriptional trans-activator, transfected with MafA-Myc, Ubiquitin-Flag and Tet-On NICD-HA, with or without stimulation with Doxy for 6h, and treated with MG132 for the last 3h of the experiments.

(H) Immunofluorescence images from MIN6-rTTA3 cells after 24h of N1ΔE expression, with or without 5 μM CHIR99021 or 10 mM LiCl. (N=4 independent experiments).

(I) Representative immunofluorescence images of MIN6-rTTA3 cells co-transfected with NICD-HA and MafA-WT-myc or MafA-S65A-myc, from 2 independent experiments, ~500 cells counted per experiment.

(J) Gene expression in MIN6 cells transduced with shRNA targeting *Kat2b* (2 different sequences: #1 and #2), or scrambled shRNA (Scr) control.

Scale bars: 20 μm. All data are shown with group means; \*\*\*,  $P < 0.001$  by two-tailed  $t$  test.

**Supplemental Figure 6**

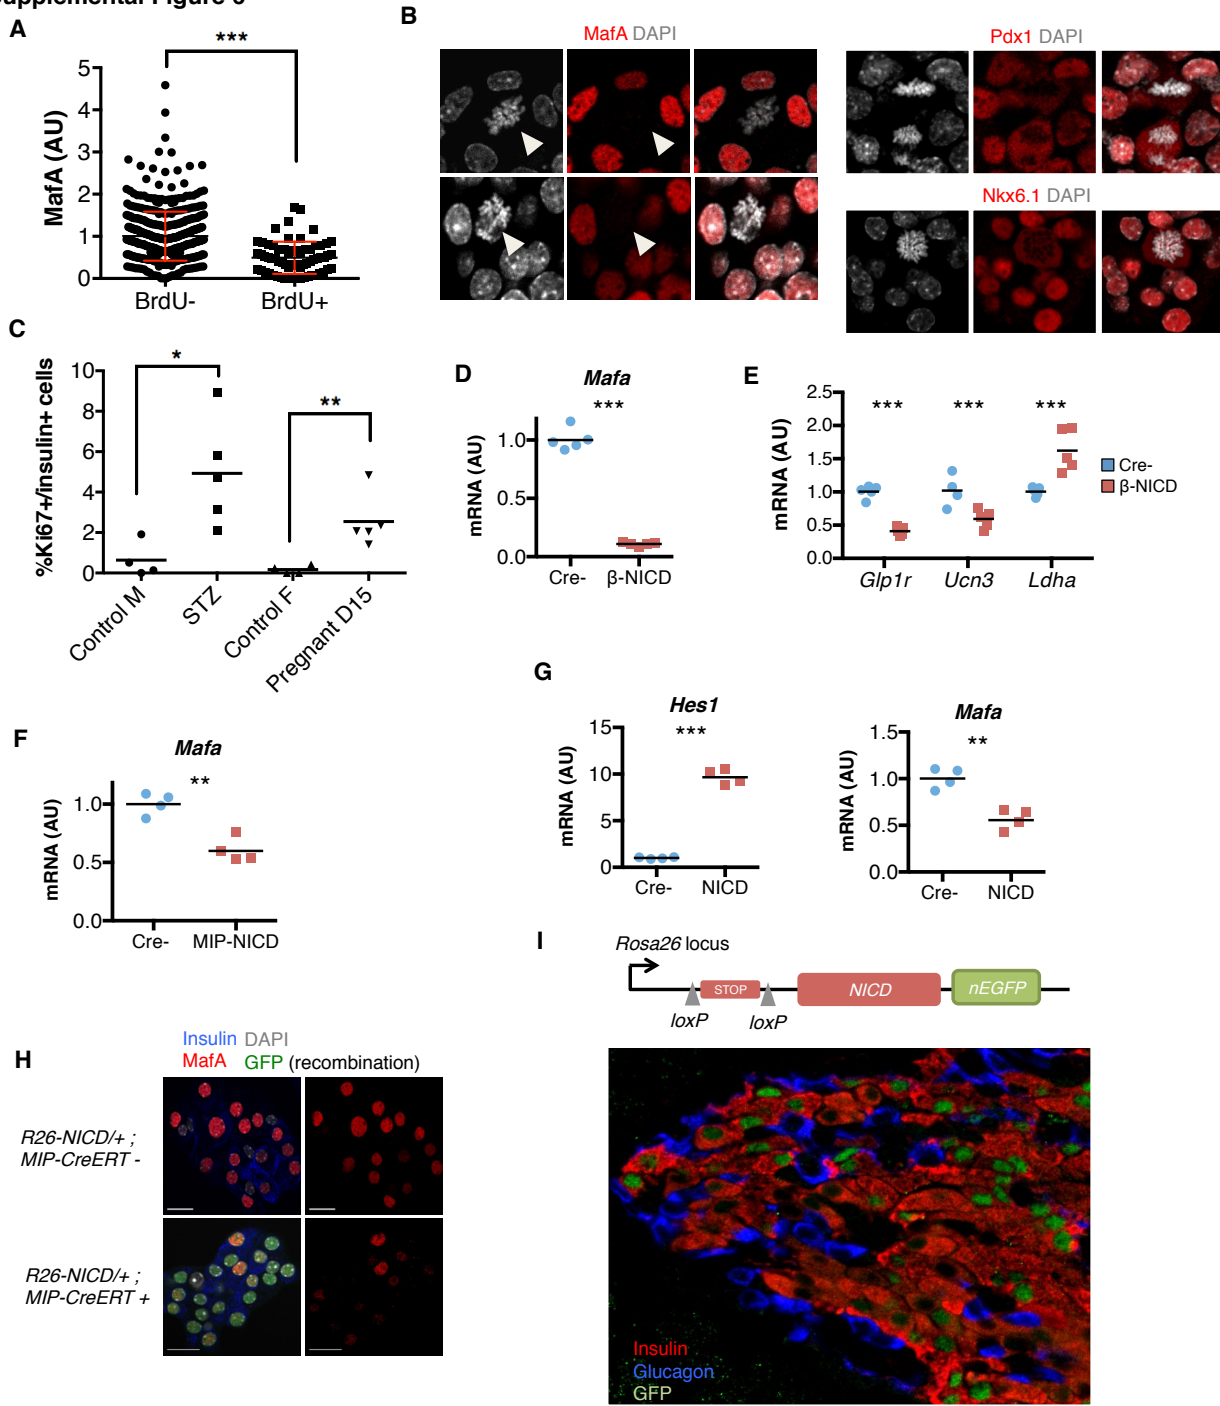

**Supplemental Figure 6. Chronic Notch activation leads to loss of *Mafa*, but not  $\beta$  cell dedifferentiation or transdifferentiation.**

(A) Quantitation of fluorescence intensity of MafA staining per cell in pancreatic sections from WT D15 pregnant mice, normalized to average fluorescence in BrdU<sup>-</sup> cells. Overall count of 472 BrdU<sup>-</sup> cells, 75 BrdU<sup>+</sup> cells ( $P < 0.0001$  by Mann-Whitney test for non-parametric data).

(B) Representative images from MIN6 cells, stained with antibodies directed against MafA, Pdx1 or Nkx6.1, showing chromatin condensation (white arrows).

(C) Quantitation of Ki67<sup>+</sup>  $\beta$  cells in pancreatic sections from vehicle- or STZ-treated TNR male (M) mice, and virgin or D15 pregnant female (F) mice.

(D) *Mafa* expression in islets isolated from  $\beta$ -NICD and Cre<sup>-</sup> control mice (N=5 mice/group).

(E) Gene expression in islets isolated from  $\beta$ -NICD and Cre<sup>-</sup> control mice (N=5 mice/group).

(F) *Mafa* expression in islets isolated from MIP- $\beta$ -NICD and Cre<sup>-</sup> mice, 8 weeks after tamoxifen treatment (N=4 mice/group).

(G) Gene expression in islets isolated from tamoxifen-naïve control and MIP- $\beta$ -NICD mice, cultured with 1  $\mu$ M 4-OHT for 21 days (N=6 mice/group).

(H) Representative images from islets isolated from tamoxifen-untreated control or MIP- $\beta$ -NICD mice, cultured with 1  $\mu$ M 4-OHT for 21 days (N=6 mice/group).

(I) In *R26-NICD* transgenic mice, transcription is blocked by an STOP cassette which is flanked by *loxP* sequences. Cre-mediated deletion allows expression of NICD and nuclear EGFP. As shown in representative image of 1 year old  $\beta$ -NICD mice, no GFP<sup>+</sup> nuclei are observed in insulin negative cells. Scale bars: 20  $\mu$ m. All data are shown with group means; \*,  $P < 0.05$ , \*\*,  $P < 0.01$ , \*\*\*,  $P < 0.001$  by two-tailed *t* test.

## Supplemental Figure 7

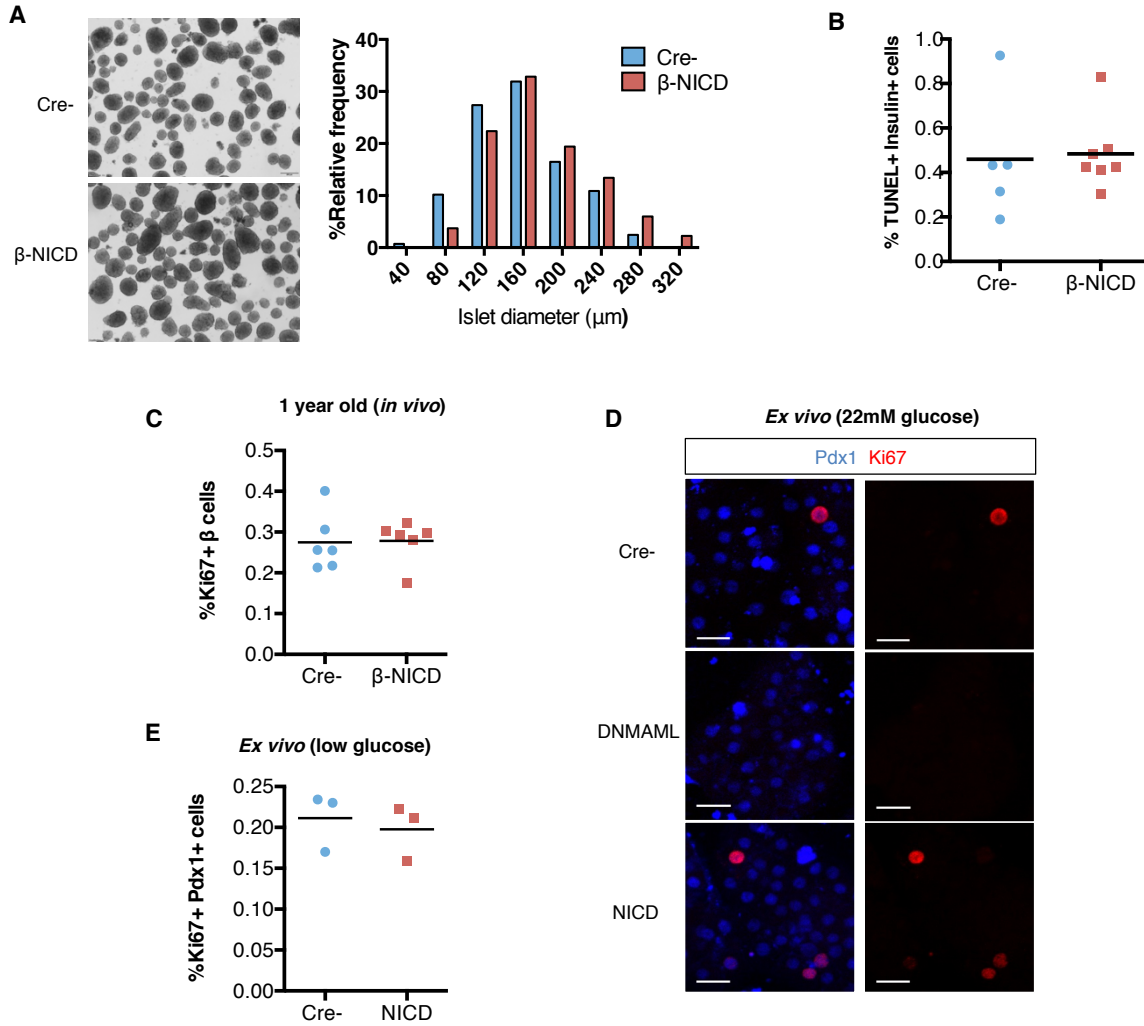

### Supplemental Figure 7. Notch activation increases β cell proliferative capacity.

(A) Isolated islets from adult β-NICD and Cre- visualized by light microscopy, with quantified distribution of islet diameter (pooled islets from 4 mice/group).

(B) Quantitation of TUNEL+ β cells in pancreatic sections from adult β-NICD and Cre- mice (N=5-7 mice/group).

(C) Quantitation of Ki67+ β cells in pancreatic sections from 1-year-old β-NICD and Cre- mice (N=5-6 mice/group).

(D) Representative images of dispersed islet cells from control (Cre-), DNMAAML (*MIP-Cre<sup>ERT</sup>+*; *R26-DNMAAML*/+), or NICD (*MIP-Cre<sup>ERT</sup>+*; *R26-NICD*/+) mice, grown in full medium containing 22 mM glucose and 1 μM 4-OHT for 4 days (N=5-7 mice/group).

(E) Quantitation of Pdx1+ Ki67+ of dispersed islet cells grown in 5.5mM glucose (N=3 mice/group).

Scale bars: 20 μm. All data are shown with group means; \*,  $P < 0.05$ , \*\*,  $P < 0.01$ , \*\*\*,  $P < 0.001$  by two-tailed *t* test.

Supplemental Figure 8

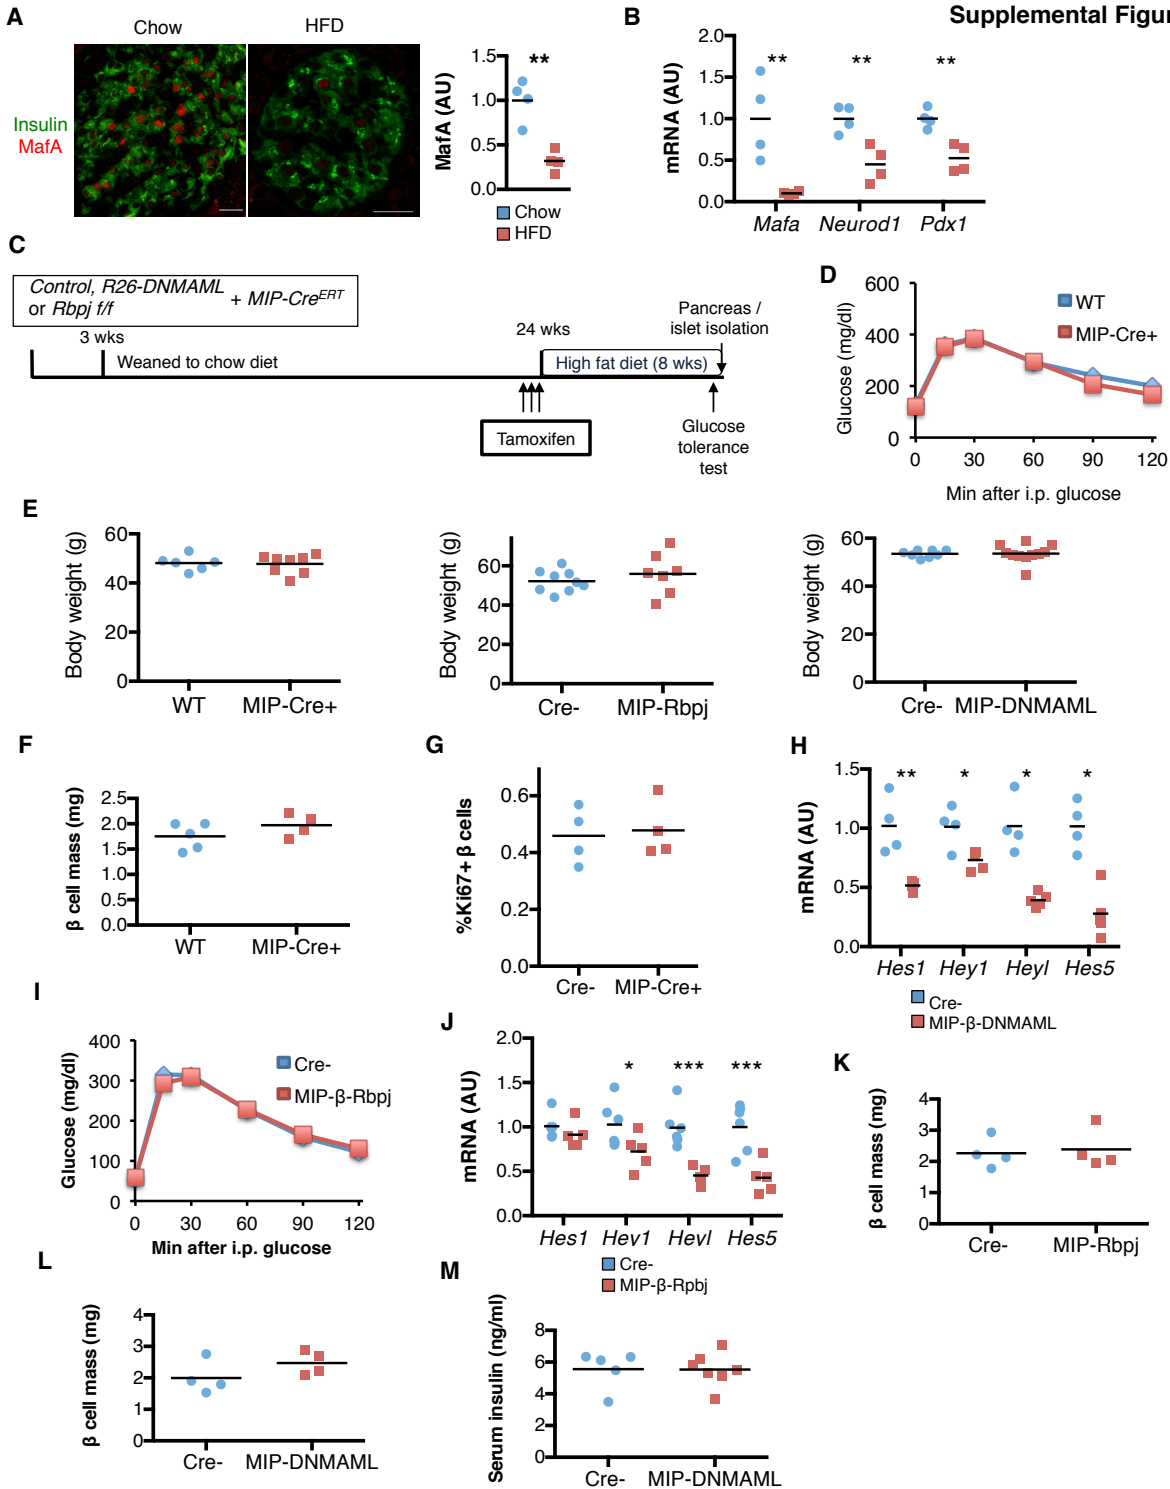

**Supplemental Figure 8. MIP-Cre<sup>ERT</sup> transgenic mice show unchanged glucose tolerance or  $\beta$  cell mass if HFD-feeding is delayed until 24-weeks.**

- (A) Representative images of pancreatic sections from WT mice fed chow or HFD for 6 months, with quantitation of MafA fluorescence intensity (N=4 mice/group).  
 (B) Gene expression of islets isolated from WT mice fed chow or HFD for 6 months (N=4 mice/group).  
 (C) Diagram that illustrates the experimental protocol used with MIP-Cre<sup>ERT</sup> lines.  
 (D) GTT in MIP-Cre<sup>ERT</sup> or WT mice treated with tamoxifen at 24 weeks, then challenged with 8 weeks of HFD feeding (N=5-7 mice/group).  
 (E) Body weight at sacrifice of WT, MIP-Cre, MIP-DNMAML, MIP-Rbpj and Cre- controls in the experiments described in Supplemental Figure 8C.  
 (F)  $\beta$  cell mass in WT or MIP-Cre<sup>ERT</sup> mice treated with tamoxifen at 24 weeks, then challenged with 8 weeks of HFD feeding (N=4 mice/group).  
 (G) Ki67+  $\beta$  cells in pancreatic sections from WT or MIP-Cre<sup>ERT</sup> mice fed chow or HFD for 6 months (N=4 mice/group).  
 (H) Gene expression in islets isolated from HFD-fed MIP- $\beta$ -DNMAML and Cre- control mice (N=4-6 mice/group).  
 (I) GTT in chow-fed MIP- $\beta$ -Rbpj and Cre- mice at 16 weeks of age, 8 weeks after tamoxifen (N=10 mice/group).  
 (J) Gene expression in islets isolated from HFD-fed MIP- $\beta$ -Rbpj and Cre- control mice (N=5-6 mice/group).  
 (K)  $\beta$  cell mass in HFD-fed MIP- $\beta$ -Rbpj and Cre- mice treated with tamoxifen at 24 weeks, then challenged with 8 weeks of HFD feeding (N=4 mice/group).  
 (L)  $\beta$  cell mass in HFD-fed MIP- $\beta$ -DNMAML and Cre- mice treated with tamoxifen at 24 weeks, then challenged with 8 weeks of HFD feeding (N=4 mice/group).  
 (M) Serum insulin in 5h fasted, HFD-fed MIP- $\beta$ -DNMAML and Cre- mice treated with tamoxifen at 24 weeks, then challenged with 8 weeks of HFD feeding (N=5-8 mice/group).

All data are shown with group means  $\pm$  s.e.m.; \*,  $P < 0.05$ , \*\*,  $P < 0.01$  by two-tailed  $t$  test.



### Supplemental Table 1 - Antibodies

| Antibody                                   | Company                   | Catalogue number |
|--------------------------------------------|---------------------------|------------------|
| Rabbit anti-Somatostatin                   | Dako                      | A0566            |
| Guinea pig anti-Insulin                    | Dako                      | A056401-2        |
| Rabbit anti Phospho-GSK-3 (Ser9)           | Cell Signaling Technology | 9336             |
| Rabbit anti GSK-3beta                      | Cell Signaling Technology | 9315             |
| Rabbit anti-PCAF (Kat2b)                   | Cell Signaling Technology | 3378S            |
| Rabbit anti-RBPJ                           | Cell Signaling Technology | 5442S            |
| Rabbit anti-HA tag                         | Cell Signaling Technology | 2367             |
| Rabbit anti-Pdx1                           | Cell Signaling Technology | 5679             |
| Rabbit anti-Notch1 (to overexpressed NICD) | Cell Signaling Technology | 4380             |
| Rabbit anti-Slc2a2 (Glut2)                 | Millipore-Sigma           | 07-1402          |
| Mouse anti-FLAG                            | Millipore-Sigma           | F3165            |
| Rabbit anti-MAFB (anti Hs)                 | Millipore-Sigma           | HPA005653        |
| Rabbit anti-NeuroD1                        | Millipore-Sigma           | ABE991           |
| Rabbit anti-MafB (anti Ms)                 | Bethyl                    | IHC-00351        |
| Mouse anti-Nkx6.1                          | DSHB                      | F55A12           |
| Rabbit anti-Ki67                           | Abcam                     | ab16667          |
| Rat anti-BrdU                              | Abcam                     | ab6326           |
| Rabbit anti-MafA (Ms/Hs)                   | Abcam                     | ab26405          |
| Goat anti-GFP                              | Abcam                     | ab6673           |
| Rabbit Anti-Cytokeratin 19                 | Abcam                     | ab15463          |
| Mouse anti-MYC (9E10)                      | Santa Cruz Biotechnology  | sc-40            |
| Rabbit anti-HES1                           | Santa Cruz Biotechnology  | sc-25392         |
| Rat anti-Endomucin                         | Santa Cruz Biotechnology  | sc-65495         |
| Mouse anti-HA                              | Roche                     | 11666606001      |

**Supplemental Table 2 - Oligonucleotides**

| <b>Gene</b>    | <b>Forward (5'-3')</b>     | <b>Reverse (5'-3')</b>   |
|----------------|----------------------------|--------------------------|
| <i>Notch1</i>  | CACAACGTGGCACGTTCCAGCA     | TGAAGCCTGTGTCTGCAGCGGA   |
| <i>Notch2</i>  | TCAACGGAGGCACCTGTCTGTC     | TGTGGTTGGGGCAGTCGTGAT    |
| <i>Notch3</i>  | CGTTCCCCCATTGAGACACCGA     | TGCCCTTCCCCGTGTCTGTAAT   |
| <i>Notch4</i>  | GGACCCCGGGCTTCACATTCAT     | TCCAGAGGGGACACTCCACCTTCA |
| <i>Jag1</i>    | TGCACCCGCGACGAGTGTGATA     | ACCTCGGCCAGGCGAAACTGAA   |
| <i>Jag2</i>    | TTGCAAAAACCTGATTGGCGGC     | TCGCAATGGCGACCTCCAAA     |
| <i>Dll1</i>    | TCTCCCGATGACCTCGCAACAGA    | TCATCCCGAGGTCGGCAGAACA   |
| <i>Dll3</i>    | TGTGCCCTTCCGCGATGCTT       | CGGGCCCTCCAGCATGCTCT     |
| <i>Dll4</i>    | TGGAGAGAGCTGTTCTCGCCTATGCA | CCAACCTGGACGGCAGATGCAC   |
| <i>Ppia</i>    | CAGACGCCACTGTCTGCTTT       | TGTCTTTGGAACCTTGTCTGCAA  |
| <i>Hes1</i>    | AGAGGCTGCCAAGGTTTTTG       | TCCCACTGTTGCTGGTGTAGA    |
| <i>Hes5</i>    | TGGTGGAGAAGATGCGTCGG       | GCGAAGGCTTTGCTGTGTTT     |
| <i>Hey1</i>    | ACGAGAATGGAACTTGAGTTC      | AACTCCGATAGTCATAGCAAG    |
| <i>Heyl</i>    | TCTGAATTGCGACGATTGGTCCCC   | CCAGGGCTCGGGCATCAAAGAA   |
| <i>Pcsk1</i>   | TTCTTCCACATTGGCTACCTCC     | GCAGGTCAGCGCTTGTTATTC    |
| <i>Pcsk2</i>   | TCTGACTGTGCTCACCTCCAA      | AGGACTCCGTAGCCAAAGAGG    |
| <i>Slc30a8</i> | TCATGGAAGGTGTTCCAAAGGG     | CACGGAGATCACGCCATCAA     |
| <i>Unc3</i>    | TGGGCATCAGCATCGCT          | GCTGTGCCCTCGACCT         |
| <i>Glp1r</i>   | CGCTGCTGTTTCGTTATCCCA      | AGTTGACGCCGATAGCAAAGAG   |
| <i>Ldha</i>    | GACTGTACTTGACAATGTTGGGA    | TGTCTCCAGCAAAGACTACTGT   |
| <i>Mafa</i>    | GAGGAGGTCATCCGACTGAAA      | GCACTTCTCGCTCTCCAGAAT    |
| <i>Pdx1</i>    | GAAATCCACCAAAGCTCACG       | CGGGTTCCGCTGTGTAAG       |
| <i>Neurod1</i> | GCCCAGCTTAATGCCATCTTT      | CAAAGGGCTGCCTTCTGTAA     |
| <i>Ins2</i>    | TTTGTCAAGCAGCACCTTTG       | GGTCTGAAGGTCACCTGCTC     |
| <i>Gcg</i>     | CTCACAGGGCACATTCACCA       | GGCAATGTTGTTCCGGTTCCT    |
| <i>Kat2b</i>   | AGATGGCCGTGTCATTGGTG       | GTGGGTTCCATAGCCCTTGAC    |

## Genotyping primers

| Targeting             | Forward (5'-3')          | Reverse (5'-3')         |
|-----------------------|--------------------------|-------------------------|
| <i>Cre</i>            | GCGGTCTGGCAGTAAAACTATC   | GTGAAACAGCATTGCTGTCACTT |
| <i>R26-NICD wt</i>    | CCAAAGTCGCTCTGAGTTGTTATC | GAGCGGGAGAAATGGATATG    |
| <i>R26-NICD mut</i>   | GAAAGACCGCGAAGAGTTTG     | AAAGTCGCTCTGAGTTGTTAT   |
| <i>R26-DNMAML wt</i>  | AAAGTCGCTCTGAGTTGTTAT    | GCGAAGAGTTTGCCTCAACC    |
| <i>R26-DNMAML mut</i> | AAAGTCGCTCTGAGTTGTTAT    | AGCGGGAGAAATGGATATGAA   |
| <i>Rbpj wt</i>        | GCATCTGTTTTGTCGTCTTCC    | CATCAGTTAGATTGGTCCTGC   |
| <i>Rbpj flox</i>      | ATCCGGGGGTACCGCGTCGAG    | CATCAGTTAGATTGGTCCTGC   |

## Sequences cloned in pLKO.1-TRC cloning vector (*AgeI* + *EcoRI*)

Targeting:

|                   |                                                                                                                                           |
|-------------------|-------------------------------------------------------------------------------------------------------------------------------------------|
| <i>Mafa</i>       | 5' CCGG GAGGAGGTCATCCGACTGAAA CTGCAG TTTCAGTCGGATGACCTCCTC TTTTGG 3', 5' AATTCAAAAA GAGGAGGTCATCCGACTGAAA CTGCAG TTTCAGTCGGATGACCTCCTC 3' |
| <i>Kat2b (#1)</i> | 5' CCGG AGTGGTATCTAGACTATTAAT CTGCAG ATTAATAGTCTAGATACCACT TTTTGG 3', 5' AATTCAAAAA AGTGGTATCTAGACTATTAAT CTGCAG ATTAATAGTCTAGATACCACT 3' |
| <i>Kat2b (#2)</i> | 5' CCGG ATGGAACATGAGAGTTTATTT CTGCAG AAATAAACTCTCATGTTCCAT TTTTGG 3', 5' AATTCAAAAA ATGGAACATGAGAGTTTATTT CTGCAG AAATAAACTCTCATGTTCCAT 3' |
| <i>Scrambled</i>  | 5'-CCGGCCTAAGGTTAAGTCGCCCTCGCTCGAGCGAGGGCGACTTAACCTTAGGTTTTTG-3', 5'-AATTCAAAAAACCTAAGGTTAAGTCGCCCTCGCTCGAGCGAGGGCGACTTAACCTTAGG- 3'      |

**Supplemental Table 3 – List of vectors used in this study**

| Plasmid                   | Insert               | Used for:                                                               | Origin                                                       |
|---------------------------|----------------------|-------------------------------------------------------------------------|--------------------------------------------------------------|
| pTRE-Tight-HA-NICD        | HA-NICD              | Transient transfection of MIN6-rTTA3                                    | Kei Sakamoto, Tokyo Medical and Dental University (1)        |
| pLenti CMV rTTA3 Blast    | rTTA3                | Lentivirus production; generation of stable rTTA3 line                  | Addgene #26429 (Eric Campeau)                                |
| pMD2.G                    | lentiviral packaging | Lentivirus production                                                   | Addgene #12259 (Didier Trono)                                |
| psPAX2                    | lentiviral envelope  | Lentivirus production                                                   | Addgene #12260 (Didier Trono)                                |
| pLKO.1-TRC cloning vector | -----                | Cloning, lentiviral production                                          | Addgene #10879 (David Root) (2)                              |
| pLKO.1-puro-scrambled     | Scrambled shRNA      | Lentivirus production                                                   | Original                                                     |
| pLKO.1-puro-Mafa          | Mafa shRNA           | Lentivirus production                                                   | Original                                                     |
| pLKO.1-puro-Kat2b#1       | Kat2b shRNA          | Lentivirus production                                                   | Original                                                     |
| pLKO.1-puro-Kat2b#2       | Kat2b shRNA          | Lentivirus production                                                   | Original                                                     |
| pCS2 Notch1 ΔEMV-6MT      | Notch1 ΔE            | Cloning Notch1 ΔE into pLVX-Tight-Puro                                  | Addgene #41737 (Raphael Kopan, Jeffrey Nye) (3)              |
| pLVX-Tight-Puro           | -----                | Cloning, lentivirus production                                          | Clontech                                                     |
| pLVX-Tight-Puro-Luc       | Luciferase           | Lentivirus production, generation of MIN6-rTTA3 Luciferase Tet-On cells | Clontech                                                     |
| pLVX-Tight-Puro-N1ΔE      | Notch1 ΔE            | Lentivirus production, generation of MIN6-rTTA3 N1ΔE-myc Tet-On cells   | Original                                                     |
| pCCL-MNDU3-DNMAML-GFP     | DnMAML1-GFP          | Lentivirus production, generation of MIN6-DNMAML1-GFP cells             | Randy Gascoigne, British Columbia Cancer Research Centre (4) |
| pCCL-MNDU3-GFP            | GFP                  | Lentivirus production, generation of MIN6-GFP cells                     | Randy Gascoigne, British Columbia Cancer Research Centre (4) |
| EF.hICN1.Ubc.GFP          | NICD-IRES-GFP        | Transient transfection                                                  | Addgene #17626 (Linzhao Cheng) (5)                           |
| pCI flag PCAF             | Kat2b-Flag           | Transient transfection                                                  | Addgene #8941 (Yoshihiro Nakatani) (6)                       |
| pCMV-Mafa-myc-WT          | Mafa-myc-WT          | Transient transfection                                                  | Roland Stein, Vanderbilt University School of Medicine (7)   |

|                    |               |                        |                                                               |
|--------------------|---------------|------------------------|---------------------------------------------------------------|
| pCMV-Mafa-myc-S65A | Mafa-myc-S65A | Transient transfection | Roland Stein, Vanderbilt University School of Medicine<br>(7) |
|--------------------|---------------|------------------------|---------------------------------------------------------------|

## References

1. Sakamoto K, Tamamura Y, Katsube K-I, Yamaguchi A. Zfp64 participates in Notch signaling and regulates differentiation in mesenchymal cells. *J Cell Sci* 2008;121(Pt 10):1613–1623.
2. Moffat J et al. A lentiviral RNAi library for human and mouse genes applied to an arrayed viral high-content screen. *Cell* 2006;124(6):1283–1298.
3. Kopan R, Schroeter EH, Weintraub H, Nye JS. Signal transduction by activated mNotch: importance of proteolytic processing and its regulation by the extracellular domain. *Proc Natl Acad Sci USA* 1996;93(4):1683–1688.
4. Kridel R et al. Whole transcriptome sequencing reveals recurrent NOTCH1 mutations in mantle cell lymphoma. *Blood* 2012;119(9):1963–1971.
5. Yu X et al. HES1 inhibits cycling of hematopoietic progenitor cells via DNA binding. *Stem Cells* 2006;24(4):876–888.
6. Yang XJ, Ogryzko VV, Nishikawa J, Howard BH, Nakatani Y. A p300/CBP-associated factor that competes with the adenoviral oncoprotein E1A. *Nature* 1996;382(6589):319–324.
7. Guo S et al. The stability and transactivation potential of the mammalian MafA transcription factor are regulated by serine 65 phosphorylation. *J Biol Chem* 2009;284(2):759–765.
